# Supplementary material
Source: publisher figshare collection journal article supplement (https://acs.figshare.com/ndownloader/files/3813328)
Supplement: Supplementary file 1 [file 3813328]

## **SUPPORTING INFORMATION**

for

### **Enrichment of Cesium and Rubidium in Weathered Micaceous Materials at the Savannah River Site, South Carolina**

*Laura K. Zaunbrecher, W. Crawford Elliott, J. M. Wampler*

Geosciences Department, Georgia State University, Atlanta, Georgia 30302, United  
States

*Nicolas Perdrial*

Department of Soil, Water, and Environmental Science, University of Arizona, Tucson,  
Arizona 85721, United States [now at Department of Geology, The University of  
Vermont, Burlington, Vermont 05405, United States]

*Daniel I. Kaplan*

Savannah River National Laboratory, Aiken, South Carolina 29808, United States

No. of pages: 28

No. of tables: 12

No. of figures: 2

## Table of Contents

|                                                                             |     |
|-----------------------------------------------------------------------------|-----|
| 1. SOIL AND SEDIMENT SAMPLES .....                                          | S3  |
| 1.1 Soil Samples.....                                                       | S3  |
| 1.2 Sediment Samples.....                                                   | S3  |
| 1.3 Soil Texture Analysis.....                                              | S7  |
| 1.4 Quantitative Determination of Crystalline Phases in Clay Fractions..... | S9  |
| 1.5 Fine Fractions .....                                                    | S11 |
| 2. CHEMICAL PROCEDURES.....                                                 | S12 |
| 2.1 Reagents and Laboratory Ware.....                                       | S12 |
| 2.2 Acid Extractions.....                                                   | S12 |
| 2.3 Digestion of Acid-Extraction Residues.....                              | S13 |
| 2.4 Preparation of Test Solutions for Instrumental Determinations.....      | S13 |
| 2.5 Instrumental Determinations.....                                        | S14 |
| 2.6 Commercial Elemental Analyses .....                                     | S14 |
| 2.7 Cesium Extraction by Cation Exchange .....                              | S15 |
| 3. PRECISION AND ACCURACY OF CHEMICAL DETERMINATIONS .....                  | S16 |
| 3.1 Procedural Blank Runs.....                                              | S16 |
| 3.1 Instrumental Precision.....                                             | S16 |
| 3.3 Precision of Acid Extractions .....                                     | S17 |
| 3.4 Accuracy of the Chemical Determinations .....                           | S19 |
| 4. RESULTS OF CHEMICAL DETERMINATIONS .....                                 | S20 |
| 4.1 Large-Ion Alkali and Alkaline-Earth Elements in Fine Fractions.....     | S20 |
| 4.2 Results of Acid Extractions .....                                       | S22 |
| 4.3 Elements Removed by Cation Exchange with Ammonium Acetate .....         | S22 |
| 5. SI REFERENCES .....                                                      | S27 |

## List of Tables

|                                                                                              |     |
|----------------------------------------------------------------------------------------------|-----|
| Table S1. Depth Ranges and Textures of the Soil Samples .....                                | S5  |
| Table S2. Depths and Clay Minerals of Sediment Samples from the BGO-3A Core .....            | S6  |
| Table S3. Rietveld Phase Quantification of Crystalline Phases and Estimated CEC Values ..... | S10 |
| Table S4. Results of Procedural Blank Runs .....                                             | S16 |
| Table S5. Relative Differences Between Values from Duplicate ICP-MS Runs .....               | S17 |
| Table S6. Differences Between Values from Duplicate Strong Acid Extractions .....            | S18 |
| Table S7. Results from Geochemical Reference Sample SCo-1 .....                              | S19 |
| Table S8. Mass Fractions of K, Rb, Cs, Sr, and Ba in Soil Fine Fractions .....               | S21 |
| Table S9. Elements Extracted by Acid and Exchanged by Ammonium Acetate .....                 | S23 |
| Table S10. Elements in Residues of Strong Acid Extractions .....                             | S24 |
| Table S11. Percentages Extracted by Acid and Exchanged by Ammonium Acetate .....             | S25 |
| Table S12. Mass Ratios of Trace Elements to K in Extracts and Residues .....                 | S26 |

## List of Figures

|                                                                                                                       |    |
|-----------------------------------------------------------------------------------------------------------------------|----|
| Figure S1. Map of the Savannah River Site showing the locations of the three soil cores and the BGO-3A borehole ..... | S4 |
| Figure S2. Ternary diagram of soil textures .....                                                                     | S8 |

## 1. SOIL AND SEDIMENT SAMPLES

**1.1 Soil Samples.** The soil samples are from three cores taken by hand auger from locations shown in Figure S1, which also shows the location of the BGO-3A borehole. The core from the location identified as ‘Fuquay,’ hereinafter identified as ‘FQ,’ is from Fuquay soil developed on the Miocene or Oligocene Upland Unit. FQTRS is a core from Fuquay soil formed on the upper Eocene Tobacco Road Sand, and FQQAL is a core from soil formed on Quaternary alluvium. The depth range of each core segment and the corresponding mean depth are given in Table S1.

**1.2 Sediment Samples.** Seven sediment samples were taken from the large-diameter core from the BGO-3A borehole<sup>S1</sup> (Figure S1) at the depths shown in Table S2, which also shows the minerals in the clay fraction of each sample as determined by conventional X-ray diffractometry.<sup>S2</sup>

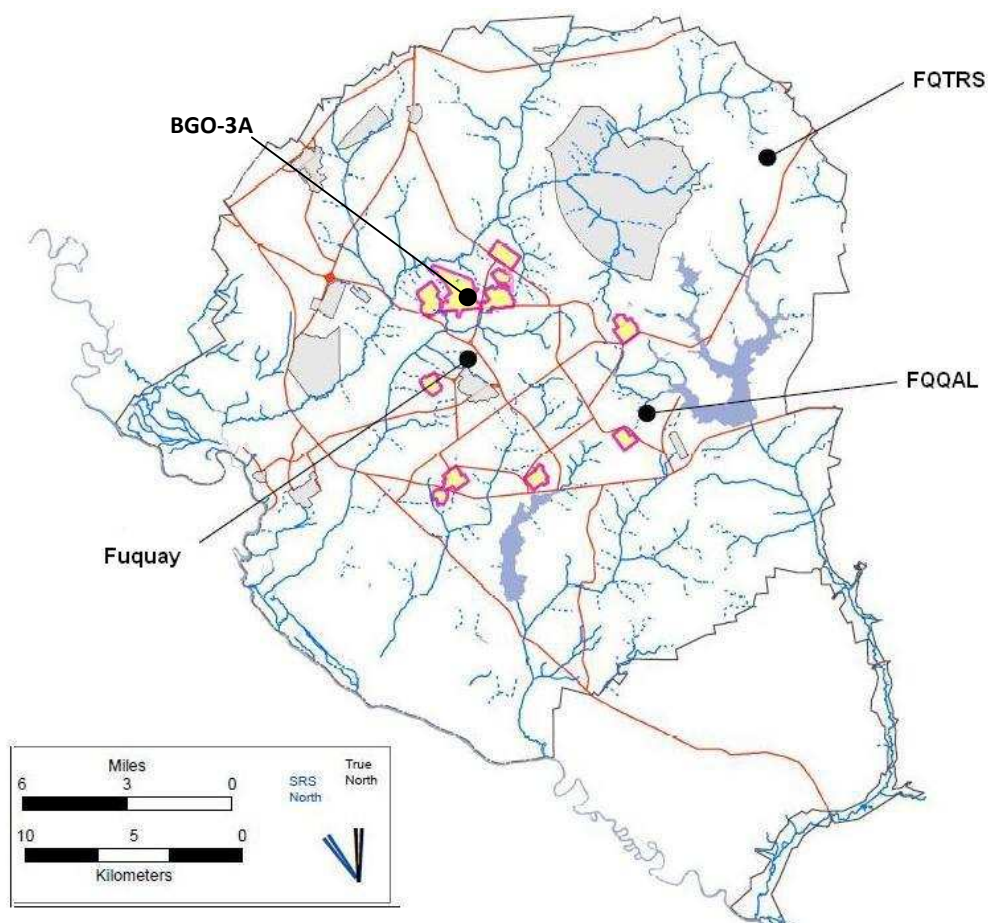

**Figure S1.** Map of the Savannah River Site showing the locations of the three soil cores and the BGO-3A borehole. Areas of yellow with pink outline are operations areas where nuclear waste was produced. Non-nuclear operations areas are in gray, major roads in are in red, and streams are in blue. Map altered from original by Laura Bagwell<sup>S3</sup> of Savannah River National Laboratory.

**Table S1.** Depth Ranges and Textures of the Soil Samples

| <b>Core</b> | <b>Depth range<br/>(cm)</b> | <b>Mean depth<br/>(cm)</b> | <b>Sand</b>              | <b>Silt</b> | <b>Clay</b> | <b>Soil texture</b> |
|-------------|-----------------------------|----------------------------|--------------------------|-------------|-------------|---------------------|
|             |                             |                            | <b>(Percent by mass)</b> |             |             |                     |
| FQ          | 0-20                        | 10                         | 87.2                     | 5.8         | 7.0         | Loamy sand          |
| FQ          | 20-36                       | 28                         | 91.3                     | 5.6         | 3.2         | Sand                |
| FQ          | 36-56                       | 46                         | 91.2                     | 6.1         | 2.7         | Sand                |
| FQ          | 56-76                       | 66                         | 88                       | 6.8         | 5.3         | Sand                |
| FQ          | 76-97                       | 86                         | 90.6                     | 5.5         | 3.9         | Sand                |
| FQ          | 97-117                      | 107                        | 89.5                     | 7.1         | 3.4         | Sand                |
| FQ          | 117-137                     | 127                        | 82.3                     | 5.8         | 11.9        | Loamy sand          |
| FQ          | 137-157                     | 147                        | 65.6                     | 4.6         | 29.8        | Sandy clay loam     |
| FQ          | 157-178                     | 168                        | 50.3                     | 8.3         | 41.5        | Sandy clay          |
| FQ          | 178-203                     | 191                        | 41.7                     | 13.3        | 45.1        | Clay                |
| FQTRS       | 0-15                        | 8                          | 92.4                     | 3.9         | 3.7         | Sand                |
| FQTRS       | 15-30                       | 23                         | 91.3                     | 5.3         | 3.4         | Sand                |
| FQTRS       | 30-46                       | 39                         | 91.6                     | 5.9         | 2.5         | Sand                |
| FQTRS       | 46-61                       | 53                         | 87.1                     | 7.1         | 5.9         | Loamy sand          |
| FQTRS       | 61-76                       | 69                         | 80.2                     | 4.2         | 15.6        | Sandy loam          |
| FQTRS       | 76-89                       | 83                         | 74.1                     | 3.3         | 22.6        | Sandy clay loam     |
| FQQAL       | 0-15                        | 8                          | 85.1                     | 7.3         | 7.6         | Loamy sand          |
| FQQAL       | 15-38                       | 22                         | 80.2                     | 13.6        | 6.2         | Loamy sand          |
| FQQAL       | 28-38                       | 33                         | 58.8                     | 3.6         | 37.6        | Sandy clay          |
| FQQAL       | 38-46                       | 42                         | 41.6                     | 12.2        | 46.2        | Clay                |
| FQQAL       | 46-61                       | 53                         | 28.7                     | 8.2         | 63.2        | Clay                |
| FQQAL       | 61-76                       | 69                         | 19.2                     | 20.3        | 60.4        | Clay                |
| FQQAL       | 76-84                       | 80                         | 27.7                     | 7.4         | 65          | Clay                |
| FQQAL       | 84-91                       | 88                         | 51.4                     | 7.1         | 41.6        | Sandy clay          |
| FQQAL       | 91-104                      | 98                         | 60.5                     | 3           | 36.5        | Sandy clay          |

**Table S2.** Depths and Clay Minerals of Sediment Samples from the BGO-3A Core

| <b>Depth</b><br>(m) | <b>Major mineral(s) in clay</b>   | <b>Minor mineral(s) in clay</b> |
|---------------------|-----------------------------------|---------------------------------|
| 8.5                 | kaolinite                         | quartz                          |
| 14.0                | kaolinite                         | quartz                          |
| 23.2                | kaolinite                         | quartz, illite or mica          |
| 28.7                | kaolinite, illite or mica, quartz | smectite                        |
| 29.7                | smectite, kaolinite, quartz       | illite or mica                  |
| 30.0                | smectite, kaolinite, quartz       | illite or mica                  |
| 30.7                | smectite, kaolinite, quartz       | illite or mica                  |

**1.3 Soil Texture Analysis.** About 25 g of a <2 mm portion of each soil sample was treated to remove organic matter, iron oxides, and carbonate cements by well-known methods<sup>S4</sup> yielding a Na-saturated sample. These treated samples were then separated into sand (2–0.05 mm), coarse silt (50–20  $\mu\text{m}$ ), fine silt (20–2  $\mu\text{m}$ ), and clay (<2  $\mu\text{m}$ ) fractions by standard timed settling techniques. The percentage of each size fraction except the clay fraction, relative to the mass of <2 mm starting material, was calculated from its mass after drying (Table S1). A maximum value for the mass of the clay fraction was calculated as the difference between the mass of the starting material (25 g) and the sum of the masses of the fractions coarser than clay and used to calculate the clay contents shown in Table S1. Because the uppermost soil segments probably contained more than 1% organic matter,<sup>S5</sup> the true clay contents of these segments likely are significantly less than the values shown for them in Table S1.

The amounts of fine silt and coarse silt were combined for texture classification according to the *Glossary of Soil Science Terms*, Soil Science Society of America.<sup>S6</sup> The soil texture class to which each sample belongs is named in Table S1 and depicted graphically in Figure S2.



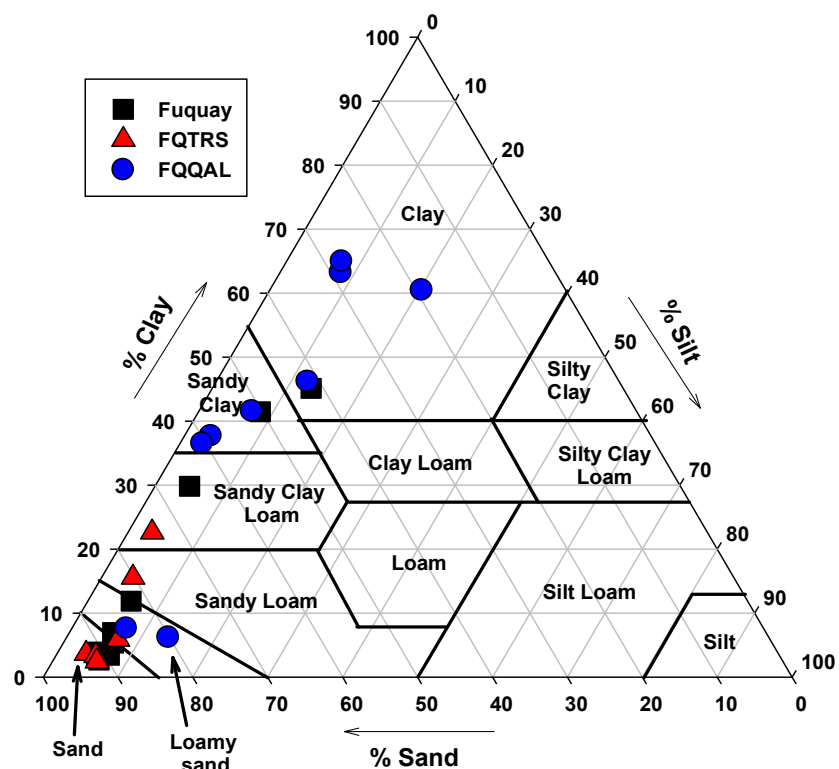

**Figure S2.** Ternary diagram of soil textures for the FQ (black squares), FQTRS (red triangles), and FQQAL (blue circles) core segments. Percentages are by mass. Soil textures are according to the *Glossary of Soil Science Terms*, Soil Science Society of America.<sup>S6</sup>

**1.4 Quantitative Determination of Crystalline Phases in Clay Fractions.** High intensity synchrotron radiation was used to obtain high resolution X-ray diffractograms necessary to quantify the crystalline phases in the clay fraction.<sup>S2</sup> Table S3 lists the results of Rietveld phase quantification of the crystalline phases in the clay fraction of each core segment and the corresponding estimate of the cation exchange capacity (CEC) of the fine fraction (<50 µm). The compositions of the phases quantified are (Fe,Mg,Al)<sub>6</sub>(Si,Al)<sub>4</sub>O<sub>10</sub>(OH)<sub>8</sub> for HIV, K(Al,Mg,Fe)<sub>2</sub>(Si,Al)<sub>4</sub>O<sub>10</sub>[(OH)<sub>2</sub>·(H<sub>2</sub>O)] for illite, Al<sub>2</sub>Si<sub>2</sub>O<sub>5</sub>(OH)<sub>4</sub> for kaolinite, Al(OH)<sub>3</sub> for gibbsite and SiO<sub>2</sub> for quartz.  $\chi^2$  represent the goodness of fit on three-point smoothed patterns and corresponds to

$$\chi^2 = [\sum_i (I_{\text{obs}} - I_{\text{calc}})_i^2 / \sigma^2(I_{\text{obs}})_i] / (n - p),$$

with  $I$  the intensity,  $\sigma(I_{\text{obs}})$  the estimated error of the measure (fixed to 10% of the counts),  $n$  the number of points used for simulation and  $p$  the number of parameters estimated. (The procedure used to estimate CEC for the fine fractions is described under ‘Fine Fractions,’ below.)

**Table S3.** Rietveld Phase Quantification of Minerals and Estimated CEC Values

| <b>Core</b> | <b>Mean<br/>depth<br/>(cm)</b> | <b>HIV<br/>(%)</b> | <b>Illite<br/>(%)</b> | <b>Kaolinite<br/>(%)</b> | <b>Gibbsite<br/>(%)</b> | <b>Quartz<br/>(%)</b> | <b><math>\chi^2</math></b> | <b>Estimated<br/>CEC<br/>(cmol<sub>c</sub> kg<sup>-1</sup>)</b> |
|-------------|--------------------------------|--------------------|-----------------------|--------------------------|-------------------------|-----------------------|----------------------------|-----------------------------------------------------------------|
| FQ          | 10                             | 26.0               | 0.0                   | 38.9                     | 7.5                     | 27.5                  | 4.2                        | 8.0                                                             |
| FQ          | 28                             | 16.4               | 0.0                   | 53.0                     | 9.9                     | 20.8                  | 17.0                       | 3.8                                                             |
| FQ          | 46                             | 24.7               | 0.0                   | 32.6                     | 9.7                     | 33.0                  | 7.2                        | 4.2                                                             |
| FQ          | 66                             | 19.0               | 0.0                   | 28.6                     | 3.6                     | 48.9                  | 6.9                        | 4.7                                                             |
| FQ          | 86                             | 16.2               | 0.0                   | 35.5                     | 6.9                     | 41.4                  | 8.6                        | 3.9                                                             |
| FQ          | 107                            | 19.1               | 0.0                   | 40.4                     | 7.0                     | 33.5                  | 9.0                        | 3.6                                                             |
| FQ          | 127                            | 12.7               | 0.0                   | 39.4                     | 10.4                    | 37.5                  | 12.3                       | 5.3                                                             |
| FQ          | 147                            | 2.1                | 0.0                   | 84.7                     | 10.4                    | 2.8                   | 9.1                        | 3.8                                                             |
| FQ          | 168                            | 2.3                | 0.0                   | 84.5                     | 11.1                    | 2.1                   | 24.2                       | 3.8                                                             |
| FQ          | 191                            | 1.3                | 0.0                   | 84.8                     | 12.8                    | 1.0                   | 19.8                       | 3.1                                                             |
| FQTRS       | 8                              | 19.1               | 7.3                   | 37.3                     | 4.7                     | 31.6                  | 2.4                        | 6.1                                                             |
| FQTRS       | 23                             | 7.7                | 6.7                   | 42.6                     | 11.5                    | 31.5                  | 3.2                        | 2.7                                                             |
| FQTRS       | 39                             | 12.6               | 8.7                   | 41.1                     | 9.5                     | 28.1                  | 4.4                        | 2.9                                                             |
| FQTRS       | 53                             | 8.5                | 9.2                   | 35.8                     | 12.6                    | 33.9                  | 4.2                        | 3.4                                                             |
| FQTRS       | 69                             | 14.7               | 13.2                  | 38.6                     | 10.5                    | 23.0                  | 1.3                        | 9.1                                                             |
| FQTRS       | 83                             | 20.2               | 11.5                  | 42.2                     | 18.3                    | 7.8                   | 6.4                        | 12.3                                                            |
| FQQAL       | 8                              | 6.1                | 22.1                  | 47.2                     | 0.0                     | 24.5                  | 5.2                        | 4.8                                                             |
| FQQAL       | 22                             | 5.3                | 27.3                  | 34.8                     | 0.0                     | 32.6                  | 4.2                        | 3.0                                                             |
| FQQAL       | 33                             | 9.2                | 13.4                  | 39.2                     | 0.0                     | 38.2                  | 1.9                        | 8.1                                                             |
| FQQAL       | 42                             | 12.0               | 17.1                  | 69.1                     | 0.0                     | 1.8                   | 2.3                        | 9.6                                                             |
| FQQAL       | 53                             | 12.7               | 16.1                  | 50.6                     | 0.0                     | 20.6                  | 7.8                        | 10.3                                                            |
| FQQAL       | 69                             | 12.9               | 12.7                  | 52.4                     | 0.0                     | 21.9                  | 7.0                        | 8.3                                                             |
| FQQAL       | 80                             | 6.7                | 18.5                  | 68.9                     | 0.0                     | 5.9                   | 2.2                        | 8.8                                                             |
| FQQAL       | 88                             | 14.0               | 13.6                  | 64.9                     | 0.0                     | 7.6                   | 3.4                        | 10.5                                                            |
| FQQAL       | 98                             | 1.9                | 13.2                  | 72.7                     | 0.0                     | 12.0                  | 4.0                        | 6.0                                                             |

**1.5 Fine Fractions.** Fine fractions of the soil and sediment samples were prepared by sieving the air-dried soil (after removal of material >2 mm) and sediment samples on a 63  $\mu\text{m}$  polyester monofilament screen manually until continued shaking was no longer effective in causing fine material to pass the sieve. The CEC of each soil fine fraction was estimated from the mass fraction of clay in the fine fraction (calculated as the ratio of the clay percentage to the sum of the clay and silt percentages, both from Table S1) times a weighted sum of the CECs of the phyllosilicate minerals in the clay fraction (weighted by their abundances in the clay fraction from Table S3). The mineral CEC values used were 50  $\text{cmol}_\text{c}/\text{kg}$  for HIV,<sup>S7</sup> 25  $\text{cmol}_\text{c}/\text{kg}$  for illite,<sup>S8</sup> and 4  $\text{cmol}_\text{c}/\text{kg}$  for kaolinite.<sup>S9,S10</sup>

## 2. CHEMICAL PROCEDURES

**2.1 Reagents and Laboratory Ware.** Trace metal grade reagents and high purity de-ionized water were used throughout except as otherwise noted. Fluorocarbon vials were used for all reactions with hot acid, and new polystyrene or polyethylene containers were used otherwise. The fluorocarbon vials were cleaned in a nitric acid bath at  $\sim 80^{\circ}\text{C}$  before each use. The new containers did not require cleaning. Evaporations were done from fluorocarbon vials under flowing clean air.

**2.2 Acid Extractions.** Portions of the soil and sediment fine fractions were treated for 3 h with hot, strong nitric acid solution. These extractions, under conditions similar to those of US EPA Method 3050B,<sup>S11</sup> were intended to remove most of the alkali metal atoms not bound in silicate structures. To a decigram of each fine fraction in a fluorocarbon vial,  $10\text{ cm}^3$  aqueous  $\text{HNO}_3$  solution ( $\sim 10\text{ mol dm}^{-3}$ ) was added and the vial was closed and shaken vigorously. The vials were then heated to about  $100^{\circ}\text{C}$  with frequent manual shaking, every 5 minutes for the first half hour, and then every 15 minutes for the next 2.5 hours. After 3 hours of extraction, vials were centrifuged at 2000 revolutions per minute (rpm) for 10 minutes. The supernatant liquids were poured into pre-weighed, acid-cleaned fluorocarbon vials and about  $5\text{ cm}^3$  of high purity deionized water was added to each of the extraction residues. The vials were then closed, shaken, and centrifuged for an additional 10 minutes at 2000 rpm, and each supernatant rinse solution was added to the corresponding original supernatant liquid. The mass of each of the combined liquids was determined by weighing the liquid in the pre-weighed vial. [Another set of decigram portions of the soil fine fractions (but including no sediment fine fractions) was treated more moderately with dilute  $\text{HNO}_3$  ( $\sim 2\text{ mol dm}^{-3}$ ) at  $80^{\circ}\text{C}$  for 3 hours in a procedure that was the same as the one just described except for the smaller acid concentration and lower temperature. Results of the more moderate acid extraction are not being reported in the present study, except that the results from one sample

(FQTRS, 39 cm) are used below to support our evaluation of the accuracy of the total of each element from the corresponding strong acid extraction.]

**2.3 Digestion of Acid-Extraction Residues.** The solid residues remaining after the acid extractions (except those from BGO-3A sediment samples from 14 m depth and below) were rinsed and then digested by gentle heating in closed fluorocarbon vials with a 5:1 (molar) mixture of concentrated HF and HNO<sub>3</sub>. After evaporation of SiF<sub>4</sub> and excess acid, these digestates were taken up in dilute HNO<sub>3</sub> (10 cm<sup>3</sup>, 0.32 mol dm<sup>-3</sup>).

**2.4 Preparation of Test Solutions for Instrumental Determinations.** Two drops of a ‘spike’ solution containing highly enriched (to 99.85%) <sup>85</sup>Rb were added to each combined extract and rinse solution, and one drop of the same solution was added to each solution containing the digested extraction residues. In each case the mass of added spike solution was determined by weighing the spike-solution container (a polyethylene dropping bottle) before and after the solution was added. The amount of added <sup>85</sup>Rb was more than the amount of natural <sup>85</sup>Rb in all of the extract solutions. The amount of added <sup>85</sup>Rb was less than the amount of natural <sup>85</sup>Rb in most of the solutions containing digested extraction residue, but in no case less than 44% of the amount of natural <sup>85</sup>Rb. Eirik Krogstad, then of Georgia State University, had calibrated the mass fraction of <sup>85</sup>Rb in the added solution by duplicate analyses of National Institute of Standards and Technology (NIST) standard reference material (SRM) 612.

Each solution with added <sup>85</sup>Rb was divided into two portions. One portion was used for trace element determinations by inductively coupled plasma mass spectrometry (ICP-MS), and the remainder was used for potassium determination by flame atomic absorption spectrophotometry (FAAS). For ICP-MS, a 4 cm<sup>3</sup> portion of each combined extract and rinse solution was heated until dry and the residue was taken up in dilute HNO<sub>3</sub> (0.32 mol dm<sup>-3</sup>). A 5 cm<sup>3</sup> portion of each solution containing the digested extraction residues was used for ICP-

MS. These did not require further processing because the digestates already had been taken up in  $0.32 \text{ mol dm}^{-3} \text{ HNO}_3$ . The solution portions to be used for K determination by FAAS were heated to dryness, and the remaining solids were taken up in a weighed amount of an acidic CsCl solution ( $0.1 \text{ mol kg}^{-1} \text{ HNO}_3$ ,  $0.01 \text{ mol kg}^{-1} \text{ CsCl}$ , both reagent grade). The Cs served as an ionization suppressant in the flame.

**2.5 Instrumental Determinations.** A Thermo Scientific Element 2 high resolution, sector magnetic field, inductively coupled plasma mass spectrometer was used for determination of Rb, Cs, Sr, and Ba. Rb was determined by stable isotope dilution from signals at mass to charge ratios ( $m/z$ ) of 85 and 87 after correction of the latter for the contribution of  $^{87}\text{Sr}$ , which was assumed to be 8.48% (the molar ratio of  $^{87}\text{Sr}$  to  $^{88}\text{Sr}$  in common Sr) of the beam intensity of  $^{88}\text{Sr}$  at  $m/z = 88$ . Cs, Sr, and Ba were determined by comparing the signals at  $m/z = 133$ , 88, and 137, respectively, to the signal at  $m/z = 85$ , using sensitivities for  $^{85}\text{Rb}$ ,  $^{88}\text{Sr}$ ,  $^{133}\text{Cs}$ , and  $^{137}\text{Ba}$  determined from bracketing runs of a solution containing  $1.00 \mu\text{g kg}^{-1}$  of each element (of natural isotopic composition). Corrections for mass spectrometer background signals were applied to all runs but were significant only for the bracketing runs.

K was determined with a Perkin-Elmer atomic absorption spectrophotometer, after test solutions had been diluted to  $<2.0 \text{ mg kg}^{-1}$  K with the acidic CsCl solution, by comparison of readings (absorbance at 766.5 nm) for test solutions with those for reference solutions of known K concentration prepared from standard KCl (NIST SRM 999).

**2.6 Commercial Elemental Analyses.** The mass fractions of Cs, Rb, Ba, Sr, and K in the fine fractions were determined by Activation Laboratories Ltd., “Actlabs” (Ancaster, Ontario) by instrumental analysis of solutions obtained by a four-acid digestion ( $\text{HF}$ ,  $\text{HNO}_3$ ,  $\text{HClO}_4$ ,  $\text{HCl}$ ). The specific procedure used is identified by the company as Code UT-6 Total Digestion ICP & ICP/MS.<sup>S12</sup>

**2.7 Cesium Extraction by Cation Exchange.** The amounts of Cs removed from 1 g portions of bulk soil (<2 mm) by ion exchange with ammonium acetate ( $1 \text{ mol dm}^{-3}$ ) at room temperature were determined by ICP-MS at the Savannah River National Laboratory.<sup>S2</sup> For comparison, the total Cs in the bulk soil was calculated, by assuming that the sand-sized material in the soil contains no Cs, as the mass fraction of Cs in the fine fraction (Table S8, below) times the mass fraction of fine material (clay- and silt-sized material, Table S1).



### 3. PRECISION AND ACCURACY OF CHEMICAL DETERMINATIONS

**3.1 Procedural Blank Runs.** Amounts of Rb, Cs, Ba, and Sr found in procedural blank runs were negligible (Table S4). The 0.8 µg of K found in the first procedural blank run for acid extraction (Table S4) was 4% of the smallest amount of K determined for an acid extract of soil but was only 2% of the average amount of K in acid extracts. (The solution from that run was not spiked with the enriched <sup>85</sup>Rb, so no results were determined for the trace elements.) The 0.8 µg was near the limit of detection, and no K was detected in a second, spiked blank run on the extraction procedure. No blank corrections were applied.

**Table S4.** Results of Procedural Blank Runs

| Procedure         | K    |     | Rb   |     | Cs   |      | Sr   |     | Ba   |     |
|-------------------|------|-----|------|-----|------|------|------|-----|------|-----|
|                   | (µg) | (%) | (ng) | (%) | (ng) | (%)  | (ng) | (%) | (ng) | (%) |
| Acid extraction   | 0.8  | 3.5 |      |     |      |      |      |     |      |     |
| Acid extraction   | 0.0  | 0.0 | 3.8  | 0.4 | −0.2 | −0.1 | 1.9  | 0.6 | 1.0  | 0.1 |
| Residue digestion |      |     | 3.2  | 0.2 | 0.1  | 0.1  | 2.5  | 0.1 | 6.0  | 0.1 |

**Note.** The amount of each element determined in a procedural blank run is expressed as a mass value and as a percentage of the smallest amount of the element found when the procedure was applied to the soil samples.

**3.2 Instrumental Precision.** Test solutions prepared from residues of the acid extraction of fine fractions from eight of the ten FQ core segments were run by ICP-MS in duplicate. The relative differences in trace element concentrations from these runs are listed in Table S5. Only a few other test solutions were run by ICP-MS a second time, and these were run a second time because the first runs had anomalous characteristics (unusually low ion beam intensities or variable internal precision values). The results from such runs are not included in Table S5. Except for the unexplained large differences obtained for the 46 cm core

segment, the results indicate acceptable precision (considered to be  $\pm 10\%$  or better for this study) for Rb, Cs, and Ba. The large relative differences for Sr are unexplained.

**Table S5.** Relative Differences Between Values from Duplicate ICP-MS Runs (First – Second)

| Mean depth<br>(cm) | Rb<br>(%) | Cs<br>(%) | Sr<br>(%) | Ba<br>(%) |
|--------------------|-----------|-----------|-----------|-----------|
| 10                 | -6.0      | 3.3       | 20        | -4.6      |
| 28                 | -3.6      | 5.6       | 23        | -0.5      |
| 46                 | -46.9     | -7.8      | -28       | -48.6     |
| 66                 |           |           |           |           |
| 86                 | -1.6      | 7.4       | 31        | 8.6       |
| 107                | -4.1      | 0.8       | 28        | 6.9       |
| 127                | -1.7      | 7.7       | 35        | 8.9       |
| 147                |           |           |           |           |
| 168                | -4.9      | -0.8      | 32        | -7.3      |
| 191                | -5.2      | 8.7       | 39        | 15.1      |
| Mean               | -9.2      | 3.1       | 22        | -2.7      |
| Standard deviation | 15.3      | 5.6       | 21        | 20.0      |
| Median             | -4.5      | 4.5       | 30        | 3.2       |

**Notes.** The test solutions were from acid extraction residues of FQ fine fractions. The solutions from 66 cm and 147 cm mean depth were run only once.

No duplicate potassium determinations of test solutions were done in this study.

Instrumental internal precision was noted by tabulating the relative standard deviation of the K concentrations calculated from two sets of bracketed absorbance readings that were taken for a single K determination. In no case was this value greater than 5%.

**3.3 Precision of Acid Extractions.** The strong acid extraction of fine fractions from the FQTRS and FQQAL cores was done twice. The relative differences in the specific amounts of the elements extracted are listed in Table S6. Given the precision of the ICP-MS

determinations suggested by the data of Table S5, the data of Table S6 show no evidence that different amounts of these elements were extracted from the FQQAL samples in the two different sets of strong acid extractions, but somewhat more K and Cs (and perhaps Sr) were extracted from FQTRS samples in the first set.

**Table S6.** Differences Between Values from Duplicate Strong Acid Extractions (First – Second)

| <b>Core</b>        | <b>Mean<br/>depth<br/>(cm)</b> | <b>K<br/>(%)</b> | <b>Rb<br/>(%)</b> | <b>Cs<br/>(%)</b> | <b>Sr<br/>(%)</b> | <b>Ba<br/>(%)</b> |
|--------------------|--------------------------------|------------------|-------------------|-------------------|-------------------|-------------------|
| FQTRS              | 8                              | 6.5              | -7.1              | 11.2              | 33                | 12.4              |
| FQTRS              | 23                             | 11.6             | 3.1               | 25.2              | 27                | 9.6               |
| FQTRS              | 38                             | 11.5             | -5.1              | 17.5              | 25                | 3.5               |
| FQTRS              | 53                             | 23.6             | -2.9              | 23.2              | 33                | 5.1               |
| FQTRS              | 69                             | 11.2             | -5.0              | 8.3               | 26                | -5.6              |
| FQTRS              | 83                             | 12.1             | -4.5              | 7.8               | 30                | -4.9              |
| FQQAL              | 8                              | 7.4              | -2.1              | 7.9               | 17                | 2.0               |
| FQQAL              | 22                             | -12.9            | -8.1              | 11.4              | 13                | -4.2              |
| FQQAL              | 33                             | 0.4              | -4.7              | -1.6              | 10                | -3.6              |
| FQQAL              | 42                             | 2.9              | -1.2              | -1.2              | 13                | -2.6              |
| FQQAL              | 53                             | 5.6              | -2.6              | -1.9              | 14                | -3.6              |
| FQQAL              | 69                             | 5.3              | -6.0              | -3.6              | 14                | -3.6              |
| FQQAL              | 80                             | 5.5              | -6.4              | -5.5              | 16                | -4.1              |
| FQQAL              | 88                             | 11.1             | -2.5              | 0.4               | 26                | 2.0               |
| FQQAL              | 98                             | 9.8              | 1.2               | 3.2               | 30                | 5.3               |
| Mean               |                                | 7.4              | -3.6              | 6.8               | 22                | 0.5               |
| Standard deviation |                                | 7.8              | 3.0               | 9.6               | 8                 | 5.7               |
| Median             |                                | 7.4              | -4.5              | 7.8               | 25                | -2.6              |

**3.4 Accuracy of the Chemical Determinations.** Determination of K, Rb, Cs, Sr, and Ba in the U. S. Geological Survey geochemical reference material SCo-1<sup>S13</sup> by a procedure essentially like that described above for the residues of acid extractions (but with considerably greater effort to get precise results for K) produced results in good agreement with the certificate values for the reference material (Table S7).

**Table S7.** Results from Geochemical Reference Sample SCo-1

|             | <b>K</b><br>(g kg <sup>-1</sup> ) | <b>Rb</b><br>(mg kg <sup>-1</sup> ) | <b>Cs</b><br>(mg kg <sup>-1</sup> ) | <b>Sr</b><br>(mg kg <sup>-1</sup> ) | <b>Ba</b><br>(mg kg <sup>-1</sup> ) |
|-------------|-----------------------------------|-------------------------------------|-------------------------------------|-------------------------------------|-------------------------------------|
| This study  | 23.0                              | 107                                 | 7.4                                 | 163                                 | 557                                 |
| Certificate | 23.0 ± 0.7                        | 110 ± 4                             | 7.8 ± 0.7                           | 170 ± 16                            | 570 ± 30                            |

Note: The value for K<sub>2</sub>O on the certificate<sup>S13</sup> has been converted to the equivalent value for K.

The good agreement with the certificate values for the trace elements shows that the <sup>85</sup>Rb-enriched spike solution had been accurately calibrated. The accuracy of the element determinations in the present study is not limited by systematic error. Because logarithmic scales (base 10) are used in presentation of nearly all of the data in the accompanying manuscript, uncertainties of about 10% for most of the elements and of about 20% for Sr are of no consequence to the interpretations of this work.

The Actlabs results were reported with results from several different geochemical reference materials for quality assurance. These results are in the quality control section of a report identified as A13-07873.<sup>S14</sup> Nearly all results for Cs, Sr, and Ba were within 10% of the certificate values. Most of the K and Rb determinations were within about 10% of the certificate values, but there are large deviations from the certificate values for several of the reference materials in several cases each.

## 4. RESULTS OF CHEMICAL DETERMINATIONS

**4.1 Large-Ion Alkali and Alkaline-Earth Elements in Fine Fractions.** The values for the mass fractions of K, Rb, Cs, Sr, and Ba in the soil fine fractions (<63  $\mu\text{m}$ ) used to calculate the data plotted in Figures 3 and 5 of the accompanying manuscript are those determined by Actlabs (Table S8) with two exceptions: (1) The fine fraction of the deepest FQ segment (191 cm) was not submitted for analysis by Actlabs, (2) The values from Actlabs for the 39 cm segment of FQTRS were judged to be systematically too large. In each of those two cases, the sum of values from the acid extract (Table S9) and the corresponding residue (Table S10) was used as the total of each element in the fine fraction.

The judgment that the values from Actlabs for the 39 cm segment of FQTRS were systematically too large is based on the observation that the Actlabs' value for each element was much larger than the total of the element from the strong acid extract and corresponding residue (Tables S9 and S10). The decision that the totals determined in-house are the better ones is based on good agreement (relative differences 8% or less) of those totals with corresponding totals from a more moderate acid extraction, which are not otherwise reported in the present study.

**Table S8.** Mass Fractions of K, Rb, Cs, Sr, and Ba in Soil Fine Fractions (<63 µm).

| <b>Core</b> | <b>Mean<br/>depth<br/>(cm)</b> | <b>K<br/>(g kg<sup>-1</sup>)</b> | <b>Rb<br/>(mg kg<sup>-1</sup>)</b> | <b>Cs<br/>(mg kg<sup>-1</sup>)</b> | <b>Sr<br/>(mg kg<sup>-1</sup>)</b> | <b>Ba<br/>(mg kg<sup>-1</sup>)</b> |
|-------------|--------------------------------|----------------------------------|------------------------------------|------------------------------------|------------------------------------|------------------------------------|
| FQ          | 10                             | 3.5                              | 26                                 | 3.4                                | 28                                 | 150                                |
| FQ          | 28                             | 5.1                              | 41                                 | 5.0                                | 31                                 | 202                                |
| FQ          | 46                             | 5.6                              | 43                                 | 5.2                                | 31                                 | 214                                |
| FQ          | 66                             | 5.9                              | 46                                 | 5.4                                | 34                                 | 220                                |
| FQ          | 86                             | 6.5                              | 55                                 | 6.5                                | 37                                 | 232                                |
| FQ          | 107                            | 6.0                              | 58                                 | 7.4                                | 36                                 | 224                                |
| FQ          | 127                            | 6.1                              | 81                                 | 11.6                               | 44                                 | 268                                |
| FQ          | 147                            | 4.6                              | 63                                 | 10.6                               | 42                                 | 217                                |
| FQ          | 168                            | 3.6                              | 42                                 | 7.4                                | 34                                 | 141                                |
| FQ          | 191                            |                                  |                                    |                                    |                                    |                                    |
| FQTRS       | 8                              | 4.3                              | 42                                 | 4.8                                | 28                                 | 174                                |
| FQTRS       | 23                             | 4.6                              | 38                                 | 3.9                                | 28                                 | 180                                |
| FQTRS       | 39                             | 6.0                              | 49                                 | 4.7                                | 42                                 | 247                                |
| FQTRS       | 53                             | 5.4                              | 46                                 | 4.5                                | 32                                 | 206                                |
| FQTRS       | 69                             | 5.8                              | 85                                 | 10.1                               | 48                                 | 302                                |
| FQTRS       | 83                             | 5.0                              | 71                                 | 9.4                                | 46                                 | 259                                |
| FQQAL       | 8                              | 20.6                             | 66                                 | 1.4                                | 56                                 | 566                                |
| FQQAL       | 22                             | 20.9                             | 76                                 | 2.2                                | 70                                 | 688                                |
| FQQAL       | 33                             | 22.4                             | 106                                | 3.9                                | 61                                 | 622                                |
| FQQAL       | 42                             | 13.0                             | 103                                | 5.7                                | 52                                 | 468                                |
| FQQAL       | 53                             | 13.1                             | 90                                 | 4.9                                | 49                                 | 416                                |
| FQQAL       | 69                             | 17.4                             | 92                                 | 4.0                                | 52                                 | 442                                |
| FQQAL       | 80                             | 13.5                             | 81                                 | 4.2                                | 44                                 | 378                                |
| FQQAL       | 88                             | 8.6                              | 67                                 | 4.9                                | 36                                 | 288                                |
| FQQAL       | 98                             | 9.6                              | 69                                 | 4.8                                | 37                                 | 306                                |
| UCC         |                                | 23.2                             | 84                                 | 4.9                                | 320                                | 628                                |

**Note.** The values are those determined by Actlabs except that those for the upper continental crust (UCC) are from Rudnick and Gao.<sup>S15</sup>

**4.2 Results of Acid Extractions.** The masses of elements extracted by hot, strong acid from soil and sediment fine fractions, each divided by the mass of fine fraction subjected to extraction, are listed in Table S9. The corresponding amount remaining in the solid residues of the extractions are listed in Table S10. The values in Table S10 are not mass fractions of the elements in the residues. Rather, each value is the mass of an element in a residue divided by the original mass of fine material (<62  $\mu\text{m}$ ) subjected to the strong acid extraction. The values for the third segment of the FQ core (46 cm) were not measured directly because material was accidentally spilled; these values are based on the total for each element determined by Actlabs less the amount extracted by the strong acid treatment.

**4.3 Elements Removed by Cation Exchange with Ammonium Acetate.** In the second column under Cs of Table S9 are values for the mass of Cs extracted from 1 g portions of bulk soil (<2 mm) by ion exchange with ammonium acetate, divided by the mass of soil subjected to ion exchange.

**Table S9.** Elements Extracted by Acid and Exchanged by Ammonium Acetate

| Core   | Mean<br>depth | K                     | Rb                     | Cs                     |       | Sr<br>(mg<br>kg <sup>-1</sup> ) | Ba<br>(mg<br>kg <sup>-1</sup> ) |
|--------|---------------|-----------------------|------------------------|------------------------|-------|---------------------------------|---------------------------------|
|        |               |                       |                        |                        |       |                                 |                                 |
|        | (cm)          | (g kg <sup>-1</sup> ) | (mg kg <sup>-1</sup> ) | (mg kg <sup>-1</sup> ) |       |                                 |                                 |
| FQ     | 10            | 0.24                  | 11                     | 2.6                    | 0.022 | 7.0                             | 44                              |
| FQ     | 28            | 0.19                  | 17                     | 4.2                    | 0.026 | 3.4                             | 50                              |
| FQ     | 46            | 0.28                  | 19                     | 4.1                    | 0.024 | 4.0                             | 49                              |
| FQ     | 66            | 0.30                  | 20                     | 4.3                    | 0.032 | 4.3                             | 47                              |
| FQ     | 86            | 0.24                  | 24                     | 4.9                    | 0.028 | 3.4                             | 48                              |
| FQ     | 107           | 0.34                  | 26                     | 5.5                    | 0.037 | 4.7                             | 57                              |
| FQ     | 127           | 0.60                  | 40                     | 8.3                    | 0.066 | 6.5                             | 101                             |
| FQ     | 147           | 0.83                  | 37                     | 7.8                    | 0.109 | 9.8                             | 101                             |
| FQ     | 168           | 0.82                  | 24                     | 5.5                    | 0.136 | 8.6                             | 62                              |
| FQ     | 191           | 0.32                  | 11                     | 3.0                    | 0.133 | 4.3                             | 29                              |
| FQTRS  | 8             | 0.34                  | 21                     | 3.8                    | 0.021 | 3.9                             | 51                              |
| FQTRS  | 23            | 0.27                  | 19                     | 3.2                    | 0.019 | 3.7                             | 54                              |
| FQTRS  | 39            | 0.26                  | 16                     | 2.5                    | 0.022 | 3.2                             | 40                              |
| FQTRS  | 53            | 0.40                  | 21                     | 3.4                    | 0.041 | 3.9                             | 54                              |
| FQTRS  | 69            | 1.04                  | 45                     | 7.0                    | 0.053 | 9.8                             | 153                             |
| FQTRS  | 83            | 1.10                  | 40                     | 6.7                    | 0.061 | 10.6                            | 141                             |
| FQQAL  | 8             | 0.20                  | 8                      | 0.8                    | 0.043 | 2.7                             | 44                              |
| FQQAL  | 22            | 0.24                  | 13                     | 1.2                    | 0.015 | 3.2                             | 73                              |
| FQQAL  | 33            | 0.57                  | 26                     | 2.7                    | 0.117 | 10.3                            | 134                             |
| FQQAL  | 42            | 0.98                  | 38                     | 3.9                    | 0.193 | 19.7                            | 179                             |
| FQQAL  | 53            | 0.92                  | 31                     | 3.3                    | 0.146 | 17.6                            | 130                             |
| FQQAL  | 69            | 0.83                  | 24                     | 2.6                    | 0.157 | 13.4                            | 85                              |
| FQQAL  | 80            | 0.84                  | 25                     | 2.8                    | 0.253 | 14.1                            | 85                              |
| FQQAL  | 88            | 0.72                  | 26                     | 3.3                    | 0.182 | 10.2                            | 71                              |
| FQQAL  | 98            | 0.73                  | 25                     | 3.2                    | 0.136 | 8.9                             | 67                              |
|        | (m)           |                       |                        |                        |       |                                 |                                 |
| BGO-3A | 8.5           | 0.13                  | 1.6                    | 0.26                   |       | 3.4                             | 20                              |
| BGO-3A | 14.0          |                       | 3.1                    | 0.51                   |       | 8.0                             | 93                              |
| BGO-3A | 23.2          | 0.89                  | 9.4                    | 2.2                    |       | 249                             | 2820                            |
| BGO-3A | 29.7          | 2.50                  | 25                     | 3.6                    |       | 247                             | 1280                            |
| BGO-3A | 30.0          | 1.88                  | 16                     | 3.0                    |       | 420                             | 1967                            |
| BGO-3A | 30.7          | 3.82                  | 34                     | 4.5                    |       | 180                             | 990                             |

**Note.** For the second column under Cs only, values are the mass of Cs extracted from unit mass of bulk soil by ion exchange with ammonium acetate relative to the soil mass.



**Table S10.** Elements in Residues of Strong Acid Extractions

| <b>Core</b> | <b>Mean<br/>depth<br/>(cm)</b> | <b>K<br/>(g kg<sup>-1</sup>)</b> | <b>Rb<br/>(mg kg<sup>-1</sup>)</b> | <b>Cs<br/>(mg kg<sup>-1</sup>)</b> | <b>Sr<br/>(mg kg<sup>-1</sup>)</b> | <b>Ba<br/>(mg kg<sup>-1</sup>)</b> |
|-------------|--------------------------------|----------------------------------|------------------------------------|------------------------------------|------------------------------------|------------------------------------|
| FQ          | 10                             | 2.8                              | 15                                 | 1.1                                | 19                                 | 95                                 |
| FQ          | 28                             | 4.3                              | 21                                 | 1.3                                | 25                                 | 134                                |
| FQ          | 46                             | 4.7                              | 19                                 | 0.9                                | 21                                 | 140                                |
| FQ          | 66                             | 5.1                              | 21                                 | 0.9                                | 22                                 | 140                                |
| FQ          | 86                             | 4.8                              | 28                                 | 1.9                                | 28                                 | 158                                |
| FQ          | 107                            | 4.4                              | 28                                 | 2.1                                | 28                                 | 144                                |
| FQ          | 127                            | 5.1                              | 36                                 | 3.5                                | 32                                 | 135                                |
| FQ          | 147                            | 2.6                              | 24                                 | 2.0                                | 21                                 | 84                                 |
| FQ          | 168                            | 2.2                              | 22                                 | 2.6                                | 23                                 | 63                                 |
| FQ          | 191                            | 2.3                              | 22                                 | 2.5                                | 24                                 | 70                                 |
| FQTRS       | 8                              | 3.5                              | 17                                 | 1.0                                | 20                                 | 109                                |
| FQTRS       | 23                             | 3.8                              | 17                                 | 0.8                                | 21                                 | 120                                |
| FQTRS       | 39                             | 4.6                              | 18                                 | 0.8                                | 23                                 | 138                                |
| FQTRS       | 53                             | 4.0                              | 21                                 | 1.1                                | 21                                 | 132                                |
| FQTRS       | 69                             | 3.9                              | 32                                 | 2.4                                | 26                                 | 118                                |
| FQTRS       | 83                             | 3.3                              | 29                                 | 2.4                                | 28                                 | 105                                |
| FQQAL       | 8                              | 16.1                             | 47                                 | 0.6                                | 45                                 | 505                                |
| FQQAL       | 22                             | 20.0                             | 62                                 | 0.8                                | 51                                 | 574                                |
| FQQAL       | 33                             | 16.2                             | 61                                 | 1.5                                | 38                                 | 450                                |
| FQQAL       | 42                             | 10.1                             | 55                                 | 1.9                                | 21                                 | 255                                |
| FQQAL       | 53                             | 7.2                              | 45                                 | 1.8                                | 21                                 | 258                                |
| FQQAL       | 69                             | 11.5                             | 48                                 | 2.2                                | 24                                 | 329                                |
| FQQAL       | 80                             | 7.0                              | 44                                 | 1.6                                | 21                                 | 272                                |
| FQQAL       | 88                             | 7.7                              | 43                                 | 1.7                                | 17                                 | 184                                |
| FQQAL       | 98                             | 8.1                              | 43                                 | 1.6                                | 19                                 | 195                                |
|             | (m)                            |                                  |                                    |                                    |                                    |                                    |
| BGO-3A      | 8.5                            |                                  | 24                                 | 0.7                                | 28                                 | 154                                |

**Note.** The amount of each element in each extraction residue is reported relative to the original mass of soil fine fraction subjected to the extraction. K in the extraction residue from BGO-3A, 8.5 m depth, was not determined.

**Table S11.** Percentages Extracted by Acid and Exchanged by Ammonium Acetate

| Core  | Mean<br>depth<br>(cm) | K<br>(%) | Rb<br>(%) | Cs |      | Sr<br>(%) | Ba<br>(%) |
|-------|-----------------------|----------|-----------|----|------|-----------|-----------|
|       |                       |          |           |    | (%)  |           |           |
| FQ    | 10                    | 7.6      | 42        | 72 | 5.1  | 27        | 31        |
| FQ    | 28                    | 4.1      | 46        | 76 | 6.1  | 12        | 25        |
| FQ    | 46                    | 5.6      | 48        | 81 | 5.2  | 15        | 26        |
| FQ    | 66                    | 5.8      | 52        | 85 | 5.0  | 17        | 26        |
| FQ    | 86                    | 4.4      | 48        | 76 | 4.6  | 11        | 23        |
| FQ    | 107                   | 6.6      | 49        | 73 | 4.8  | 15        | 28        |
| FQ    | 127                   | 10.9     | 53        | 71 | 3.2  | 18        | 43        |
| FQ    | 147                   | 23       | 61        | 80 | 3.0  | 32        | 54        |
| FQ    | 168                   | 27       | 55        | 68 | 3.7  | 27        | 50        |
| FQ    | 191                   | 12.3     | 33        | 55 | 4.1  | 16        | 29        |
| FQTRS | 8                     | 8.9      | 56        | 78 | 5.9  | 16        | 32        |
| FQTRS | 23                    | 6.7      | 53        | 80 | 5.6  | 15        | 32        |
| FQTRS | 39                    | 5.4      | 46        | 75 | 8.3  | 13        | 22        |
| FQTRS | 53                    | 8.6      | 51        | 77 | 7.0  | 16        | 29        |
| FQTRS | 69                    | 21       | 60        | 71 | 2.7  | 27        | 57        |
| FQTRS | 83                    | 25       | 57        | 72 | 2.5  | 30        | 61        |
| FQQAL | 8                     | 1.2      | 15        | 54 | 20.7 | 5.9       | 8.0       |
| FQQAL | 22                    | 1.2      | 17        | 58 | 3.4  | 5.9       | 11        |
| FQQAL | 33                    | 3.4      | 30        | 63 | 7.3  | 22        | 22        |
| FQQAL | 42                    | 9.0      | 42        | 67 | 5.8  | 48        | 40        |
| FQQAL | 53                    | 9.4      | 40        | 64 | 4.1  | 46        | 33        |
| FQQAL | 69                    | 6.6      | 36        | 56 | 4.9  | 36        | 20        |
| FQQAL | 80                    | 7.2      | 35        | 64 | 8.4  | 41        | 24        |
| FQQAL | 88                    | 8.5      | 38        | 65 | 7.6  | 37        | 28        |
| FQQAL | 98                    | 8.5      | 38        | 65 | 7.1  | 32        | 24        |

**Notes.** Except for the second column under Cs, values are the percentages of elements extracted by hot, strong acid from soil fine fractions. The percentages are relative to the total of each element determined by Actlabs (Table S10), with two exceptions explained at the beginning of this section (§4). For the second column under Cs only, values represent the amount of Cs extracted from bulk soil expressed as a percentage of the amount of Cs in the soil, the latter calculated as explained above (§2.7) by the assumption that there is no Cs in the sand-sized fraction.

**Table S12.** Mass Ratios of Trace Elements to K in Extracts and Residues

| Core   | Mean<br>depth<br>(cm) | Extracts |        |       |      | Residues |         |        |       |
|--------|-----------------------|----------|--------|-------|------|----------|---------|--------|-------|
|        |                       | Rb/K     | Cs/K   | Sr/K  | Ba/K | Rb/K     | Cs/K    | Sr/K   | Ba/K  |
| FQ     | 10                    | 0.045    | 0.0108 | 0.029 | 0.19 | 0.0052   | 0.00038 | 0.0068 | 0.033 |
| FQ     | 28                    | 0.086    | 0.0218 | 0.018 | 0.26 | 0.0048   | 0.00031 | 0.0057 | 0.031 |
| FQ     | 46                    | 0.068    | 0.0145 | 0.014 | 0.18 | 0.0047   | 0.00021 | 0.0049 | 0.032 |
| FQ     | 66                    | 0.068    | 0.0143 | 0.015 | 0.16 | 0.0041   | 0.00018 | 0.0043 | 0.027 |
| FQ     | 86                    | 0.102    | 0.0206 | 0.014 | 0.20 | 0.0058   | 0.00039 | 0.0059 | 0.033 |
| FQ     | 107                   | 0.078    | 0.0165 | 0.014 | 0.17 | 0.0064   | 0.00049 | 0.0063 | 0.033 |
| FQ     | 127                   | 0.067    | 0.0138 | 0.011 | 0.17 | 0.0070   | 0.00068 | 0.0063 | 0.027 |
| FQ     | 147                   | 0.044    | 0.0093 | 0.012 | 0.12 | 0.0095   | 0.00078 | 0.0082 | 0.033 |
| FQ     | 168                   | 0.030    | 0.0067 | 0.010 | 0.08 | 0.0100   | 0.00117 | 0.0101 | 0.028 |
| FQ     | 191                   | 0.035    | 0.0094 | 0.013 | 0.09 | 0.0099   | 0.00111 | 0.0106 | 0.031 |
| FQTRS  | 8                     | 0.063    | 0.0113 | 0.012 | 0.15 | 0.0049   | 0.00028 | 0.0058 | 0.031 |
| FQTRS  | 23                    | 0.069    | 0.0115 | 0.013 | 0.20 | 0.0045   | 0.00022 | 0.0056 | 0.031 |
| FQTRS  | 39                    | 0.061    | 0.0097 | 0.012 | 0.15 | 0.0040   | 0.00018 | 0.0051 | 0.030 |
| FQTRS  | 53                    | 0.053    | 0.0085 | 0.010 | 0.13 | 0.0051   | 0.00026 | 0.0053 | 0.033 |
| FQTRS  | 69                    | 0.044    | 0.0067 | 0.009 | 0.15 | 0.0081   | 0.00061 | 0.0067 | 0.030 |
| FQTRS  | 83                    | 0.037    | 0.0061 | 0.010 | 0.13 | 0.0089   | 0.00074 | 0.0084 | 0.032 |
| FQQAL  | 8                     | 0.043    | 0.0040 | 0.014 | 0.22 | 0.0029   | 0.00004 | 0.0028 | 0.031 |
| FQQAL  | 22                    | 0.053    | 0.0050 | 0.013 | 0.30 | 0.0031   | 0.00004 | 0.0025 | 0.029 |
| FQQAL  | 33                    | 0.045    | 0.0046 | 0.018 | 0.23 | 0.0038   | 0.00009 | 0.0023 | 0.028 |
| FQQAL  | 42                    | 0.038    | 0.0040 | 0.020 | 0.18 | 0.0054   | 0.00019 | 0.0021 | 0.025 |
| FQQAL  | 53                    | 0.033    | 0.0036 | 0.019 | 0.14 | 0.0051   | 0.00021 | 0.0023 | 0.029 |
| FQQAL  | 69                    | 0.029    | 0.0031 | 0.016 | 0.10 | 0.0041   | 0.00019 | 0.0021 | 0.029 |
| FQQAL  | 80                    | 0.029    | 0.0034 | 0.017 | 0.10 | 0.0041   | 0.00014 | 0.0019 | 0.025 |
| FQQAL  | 88                    | 0.036    | 0.0046 | 0.014 | 0.10 | 0.0056   | 0.00023 | 0.0022 | 0.024 |
| FQQAL  | 98                    | 0.034    | 0.0043 | 0.012 | 0.09 | 0.0052   | 0.00020 | 0.0023 | 0.024 |
|        | (m)                   |          |        |       |      |          |         |        |       |
| BGO-3A | 8.5                   | 0.012    | 0.0019 | 0.025 | 0.15 |          |         |        |       |
| BGO-3A | 23.2                  | 0.011    | 0.0025 | 0.28  | 3.2  |          |         |        |       |
| BGO-3A | 29.7                  | 0.010    | 0.0015 | 0.10  | 0.51 |          |         |        |       |
| BGO-3A | 30.0                  | 0.009    | 0.0016 | 0.22  | 1.05 |          |         |        |       |
| BGO-3A | 30.7                  | 0.009    | 0.0012 | 0.05  | 0.26 |          |         |        |       |

**Note.** No data were obtained from the residues of acid extraction of fine fraction of the BGO-3A core samples.

## 5. SI REFERENCES

- (S1) Grogan, K. P.; Fjeld, R. A.; Kaplan, D. I.; Shine, G. P.; DeVol, T. A.; Coates, J.; Seaman, J. *Distribution of sorption coefficients ( $K_d$  values) in the SRS subsurface environment*. WSRC-STI-2008-00285; Savannah River National Laboratory, Washington Savannah River Company: Aiken, SC, 2008.
- (S2) Zaunbrecher, L. K. The enrichment of stable cesium and rubidium in Savannah River Site soils. Ph.D. Dissertation, Georgia State University, Atlanta, GA, 2013; [http://scholarworks.gsu.edu/geosciences\\_diss/4](http://scholarworks.gsu.edu/geosciences_diss/4).
- (S3) Unpublished map drawn by Laura Bagwell, Savannah River National Laboratory. This map was also used in the unpublished dissertation by Laura Zaunbrecher (S2).
- (S4) Jackson, M.L. *Soil Chemical Analysis Advanced Course*, 2nd ed.; University of Wisconsin: Madison, WI, 1969.
- (S5) Looney, B. B.; Eddy, C. A.; Ramdeen, M.; Pickett, J.; Rogers, V.; Scott, M. T.; Shirley, P. A. *Geochemical and physical properties of soils and shallow sediments at the Savannah River Site*; WSRC-RP-90-1031; Westinghouse Savannah River Company: Aiken, SC, 1990, p 83.
- (S6) *Glossary of Soil Science Terms*, Soil Science Society of America. <https://www.soils.org/publications/soils-glossary> (accessed October 16, 2014).
- (S7) Kirkland, D. L.; Hajek, B. F. Formula derivation of Al-interlayered vermiculite in selected soil clays. *Soil Sci.* **1972**, *114*, 317–322.
- (S8) Polubesova, T.; Nir, S. Modeling of organic and inorganic cation sorption by illite. *Clays Clay Miner.* **1999**, *47*, 366–374.

(S9) Ma, C.; Eggleton, R. A. Cation exchange capacity of kaolinite. *Clays Clay Miner.* **1999**, *47*, 174–180.

(S10) Borden, D.; Giese, R. F. Baseline studies of the Clay Minerals Society source clays: Cation exchange capacity measurements by the ammonia-electrode method. *Clays Clay Miner.* **2001**, *49*, 444–445.

(S11) *Acid digestion of sediments, sludges, and soils*; Method 3050B; U. S. Environmental Protection Agency: Washington, DC, 1996.

(S12) Ultratrace 6 - Total Digestion - ICP and ICP/MS. Actlabs: Ancaster, Ontario, L9G 4V5, Canada.

<http://www.actlabs.com/page.aspx?page=510&app=226&cat1=549&tp=12&lk=no&menu=64> (accessed October 30, (2014).

(S13) U. S. Geological Survey, *Cody Shale, SCo-1* (Certificate of Analysis); [http://crustal.usgs.gov/geochemical\\_reference\\_standards/codyshale.html](http://crustal.usgs.gov/geochemical_reference_standards/codyshale.html) (accessed October 16, 2014).

(S14) A13-07873 Certificate of Analysis and Results. Report to W. Crawford Elliott; Activation Laboratories Ltd: Ancaster, Ontario, Canada, 23 July 2014. Available upon request to the corresponding author.

(S15) Rudnick, R. L.; Gao, S. Composition of the continental crust. In *The Crust*; Rudnick, R. L., Ed.; Vol. 3 of *Treatise on Geochemistry*; Holland, H. D., Turekian, K. K., Eds.; Elsevier-Pergamon: Oxford, 2004; pp 1–64.
